# Supplementary material for: Development of simple protocols to solve the problems of enzyme coimmobilization. Application to coimmobilize a lipase and a β-galactosidase
Source: Royal Society of Chemistry journal article supplement (doi:10.1039/c6ra10906c), 2016-01-01
Supplement: c6ra10906c1.pdf [file c6ra10906c1.pdf]

### Figure Legends of supporting information

**Fig. 1S** Panel (a) immobilization course of CALB at pH 7 on octyl agarose at low ionic strength (5 mM). Experimental conditions are detailed in Section 2. *Close circles*: suspension; *triangle*, dashed line: supernatant; *open circles*: reference. Panel (b) thermal stability of free and immobilized CALB at 80 °C and pH 5. *Circles*, solid line: OCCALB; *triangles*, dashed line: free CALB.

**Fig 2S** Immobilization courses of  $\beta$ -galactosidase on octyl agarose activated with dextran sulphate or polyethylenimine. Panels (a) and (b)  $\beta$ -gal on octyl-PEI at pH 5 and 7, respectively. Panels (c) and (d)  $\beta$ -gal on octyl-DS at pH 5 and 7, respectively. *Circles*, solid line: suspension; *triangles*, dashed line: supernatant.

**Fig 3S** Thermal inactivation of octyl-PEI preparations of  $\beta$ -galactosidase at different pH. Inactivations were performed at 50 °C. Panel (a): pH 5; (b): pH 7; (c): pH 9. *Circles*: octyl-PEI- $\beta$ -gal; *squares*: free  $\beta$ -gal.

### Supporting information

(a)

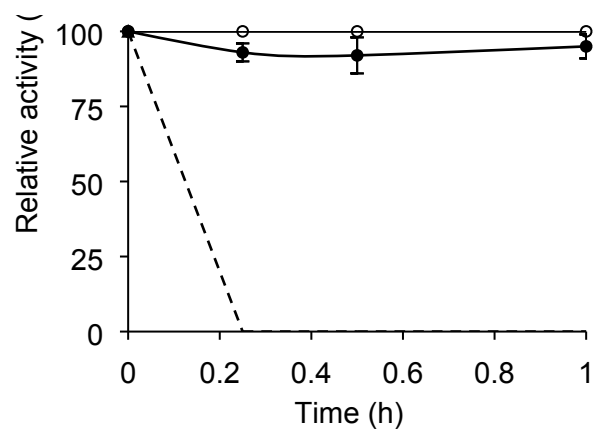

(b)

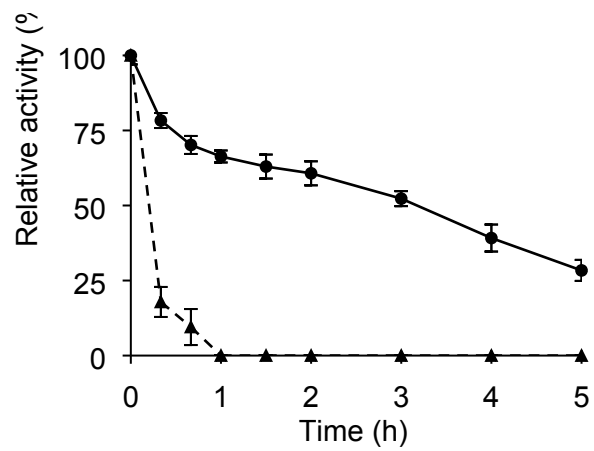

Fig. 1S

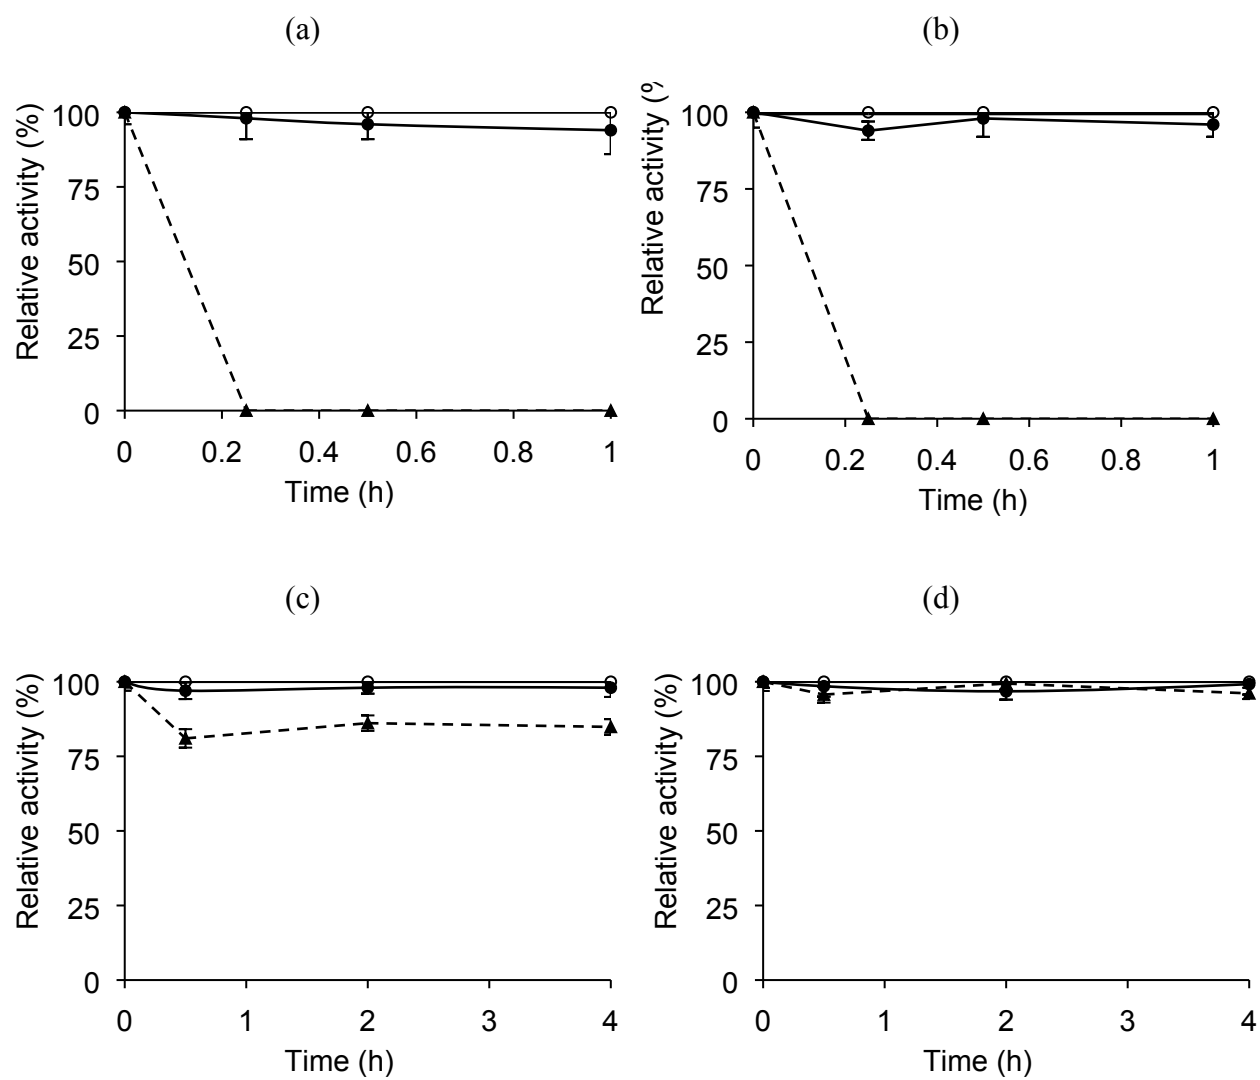

**Fig. 2S**

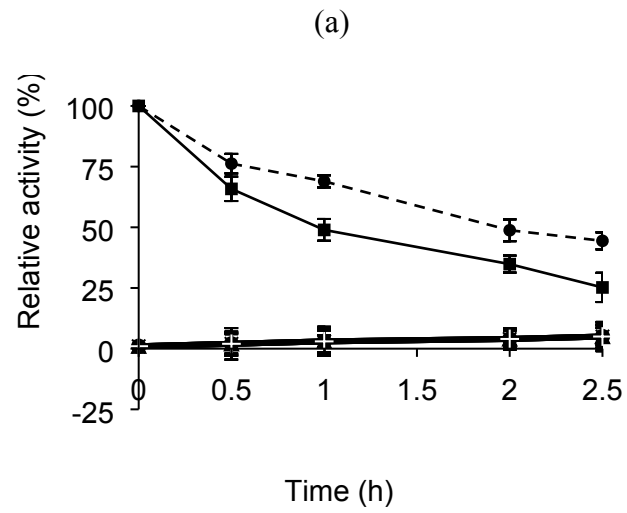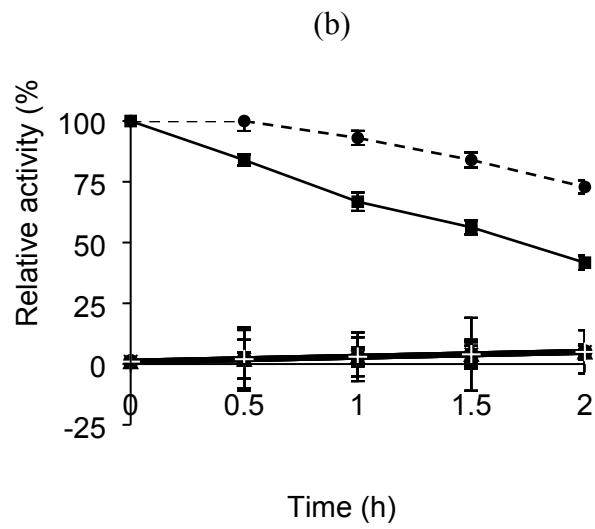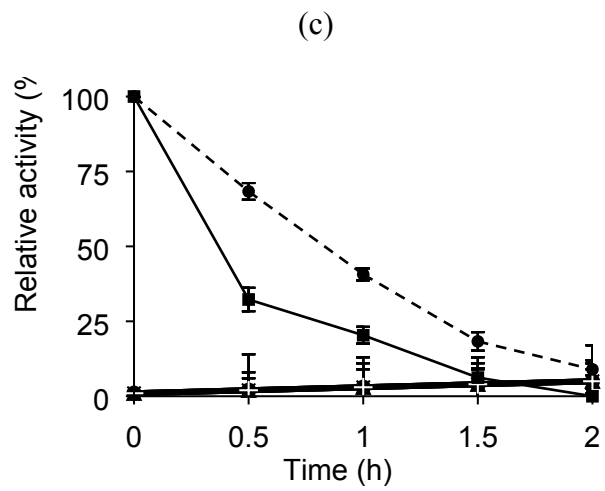

Fig. 3S
